# Supplementary material for: Miz-1 Activates Gene Expression via a Novel Consensus DNA Binding Motif
Source: PubMed Central journal article supplement (PMC4077741; doi:10.1371/journal.pone.0101151), 2014-07-01

**Barcode ACA: 50 nM MBP-Miz1-FL, 1 mM salt**

BC FG BG Enrichment Forward motif

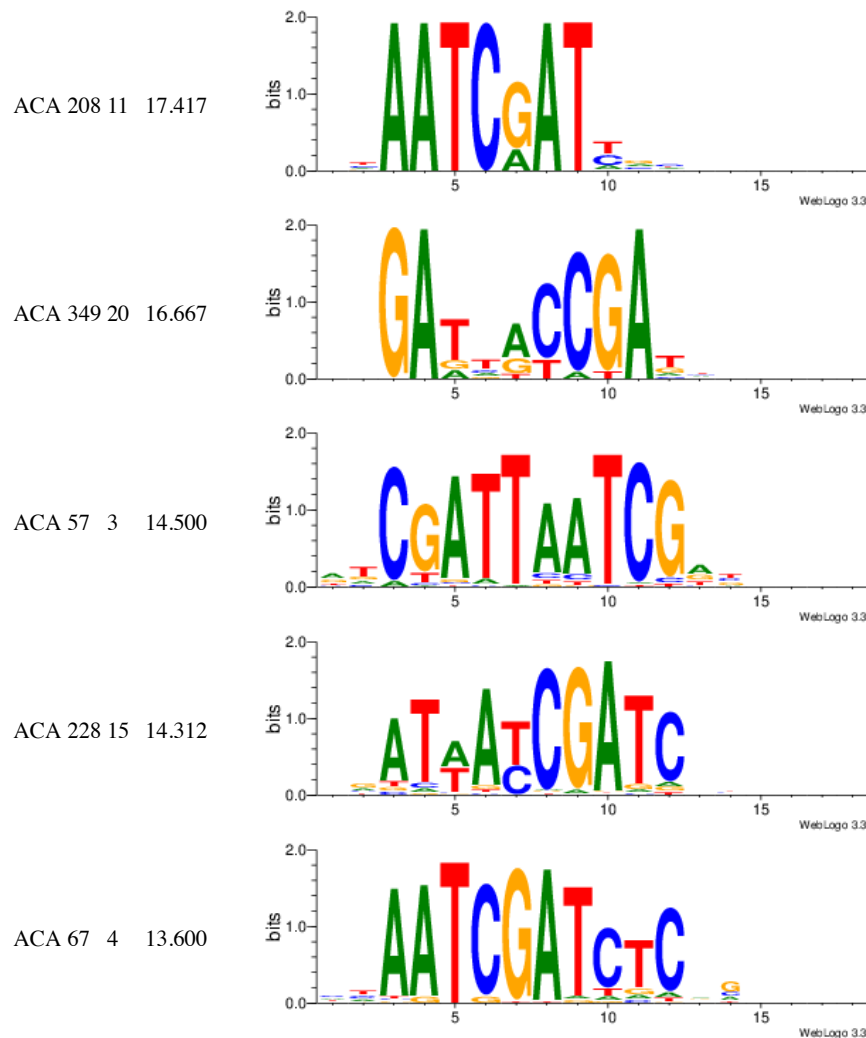

Reverse comp. motif

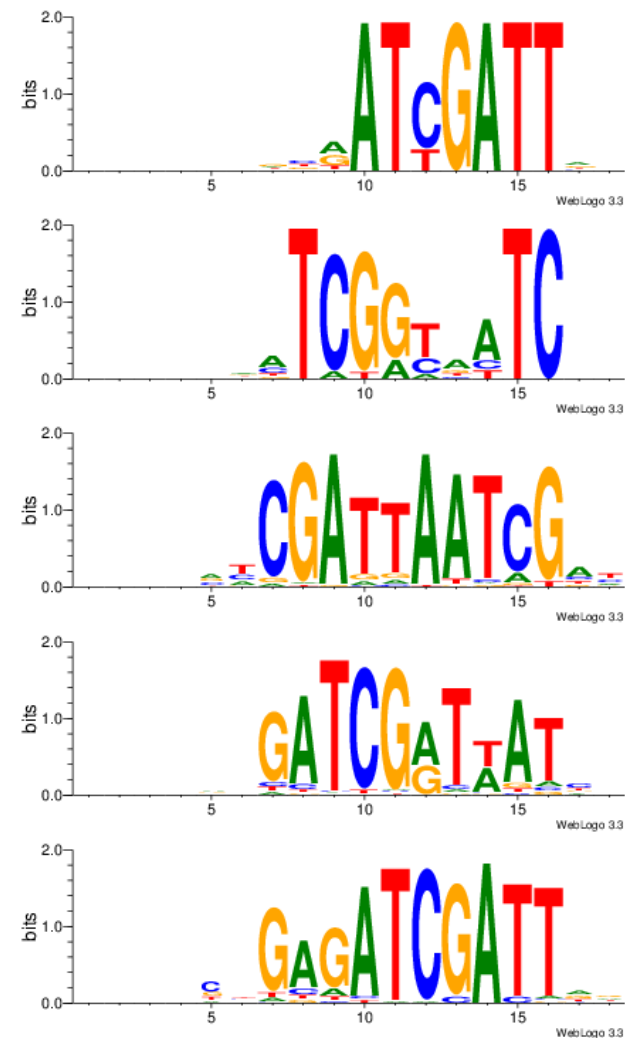

**Barcode ACC: 50 nM MBP-Miz1-FL, 50 mM salt**

BC FG BG Enrichment Forward motif

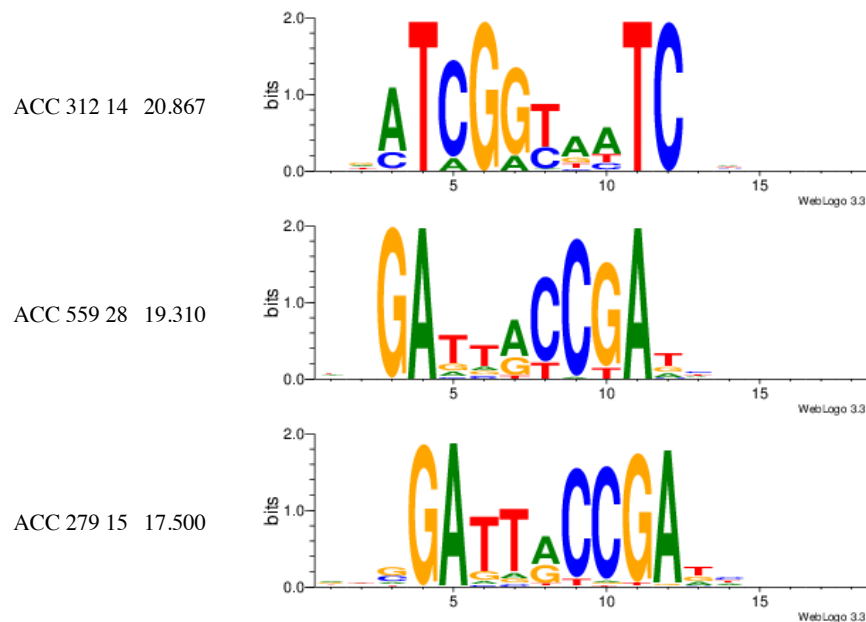

Reverse comp. motif

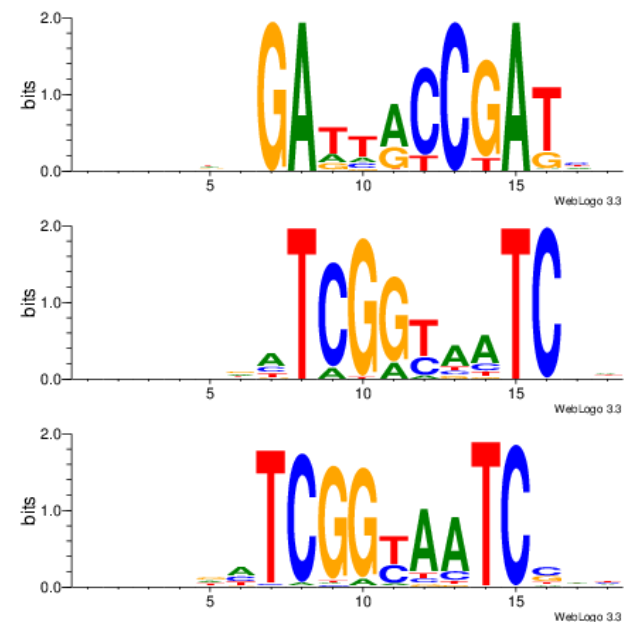

ACC 355 20 16.952

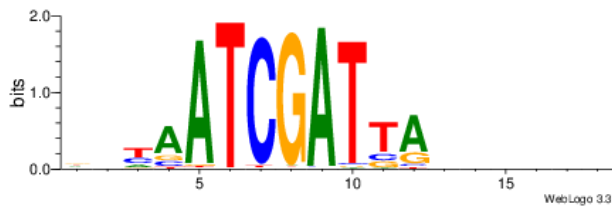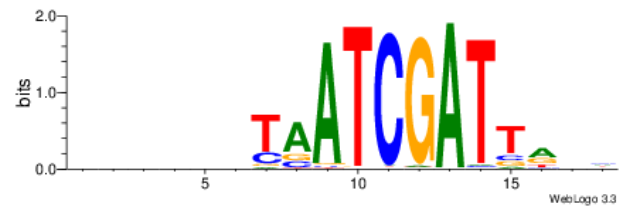

ACC 263 16 15.529

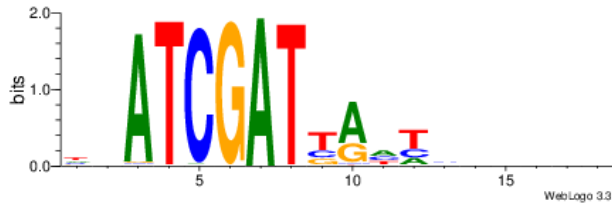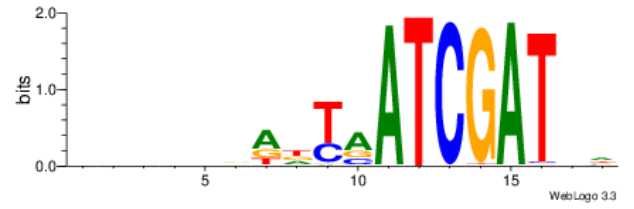

## Barcode ACG: 50 nM MBP-Miz1-FL, 100 mM salt

BC FG BG Enrichment Forward motif

Reverse comp. motif

ACG 112 7 14.125

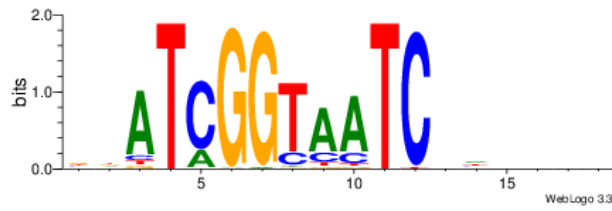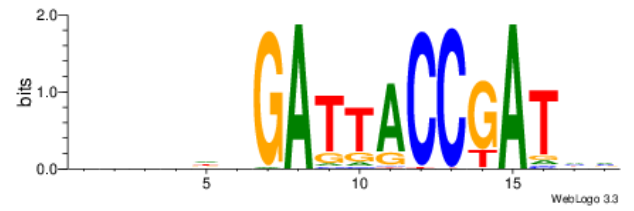

ACG 309 22 13.478

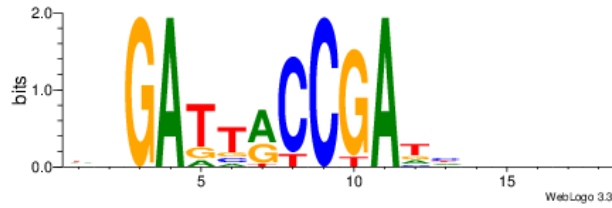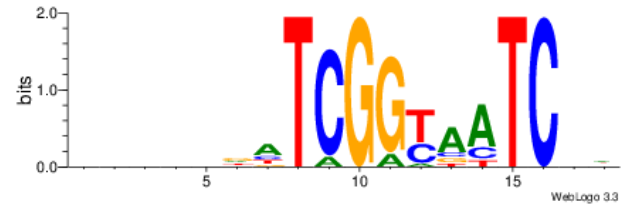

ACG 63 4 12.800

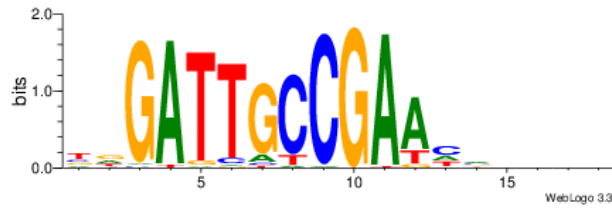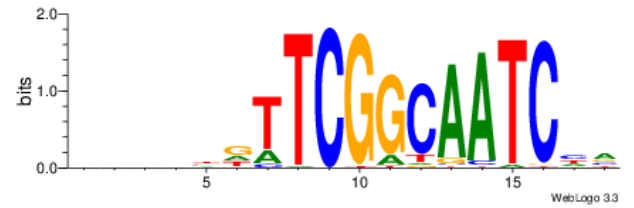

ACG 176 4 11.800

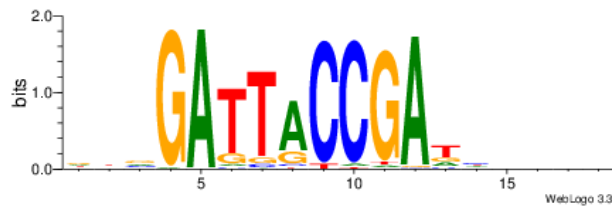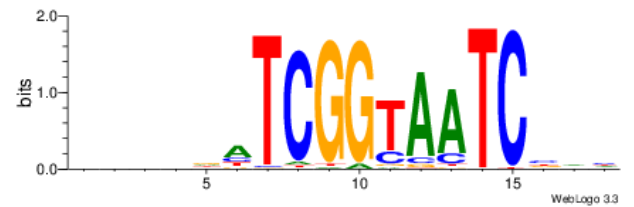

ACG 139 11 11.667

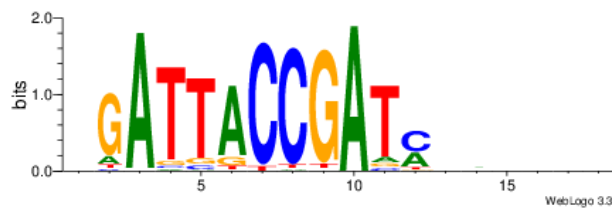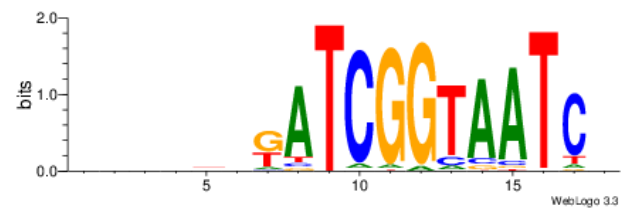

## Barcode ACT: 5 nM MBP-Miz1-FL, 100 mM salt

BC FG BG Enrichment Forward motif

Reverse comp. motif

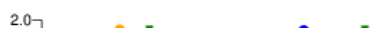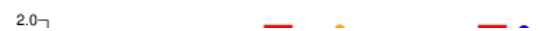

ACT 254 25 9.808

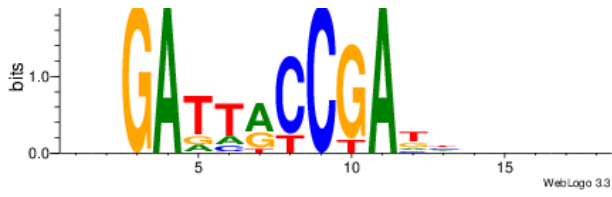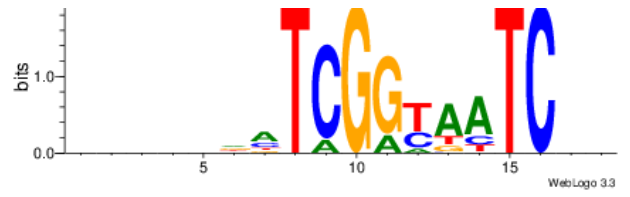

ACT 95 9 9.600

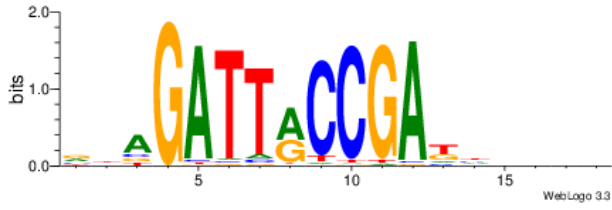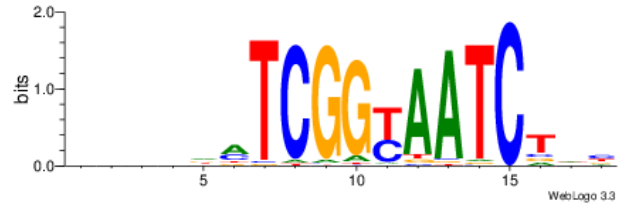

ACT 149 15 9.375

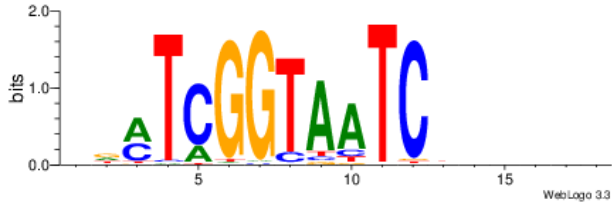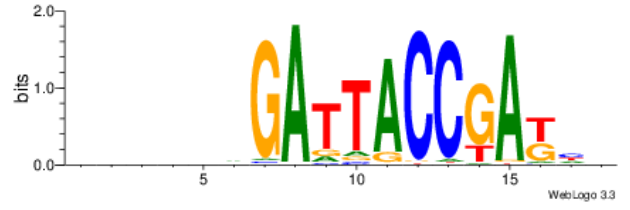

ACT 265 41 6.333

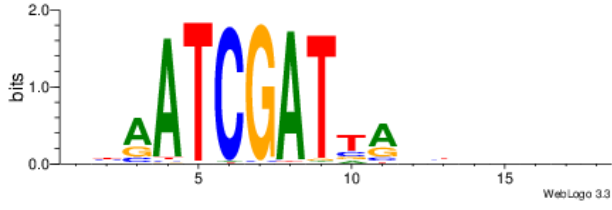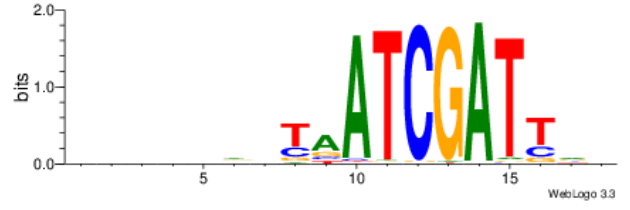

ACT 181 30 5.871

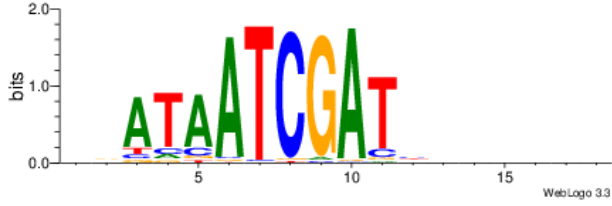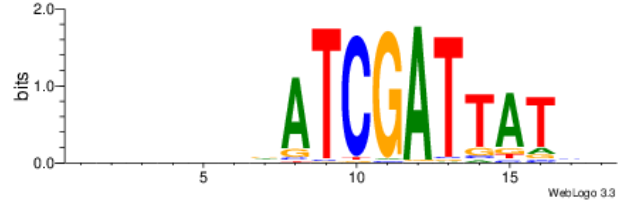

## Barcode AGA: 350 nM MBP-Miz1-FL, 100 mM salt

BC FG BG Enrichment Forward motif

Reverse comp. motif

AGA 412 36 11.162

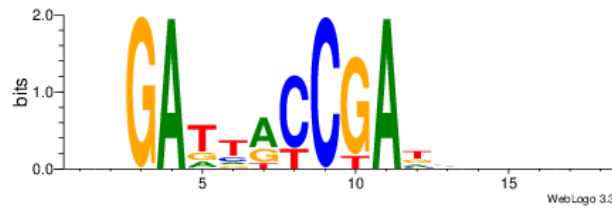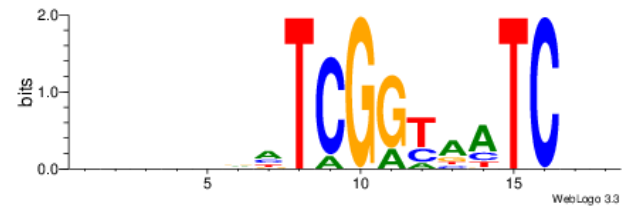

AGA 385 34 11.029

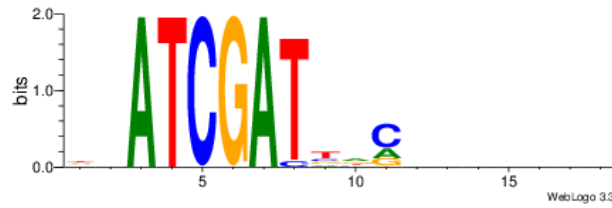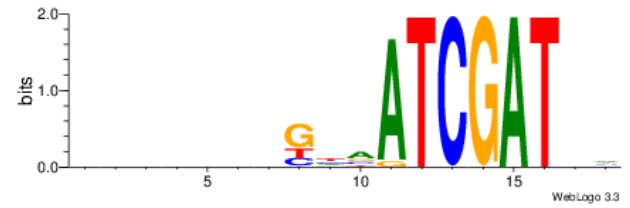

AGA 494 44 11.000

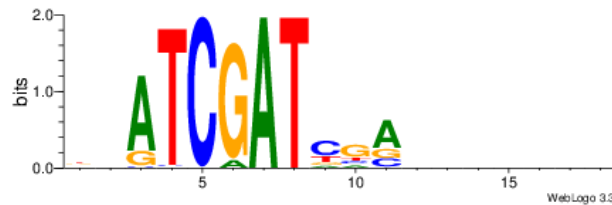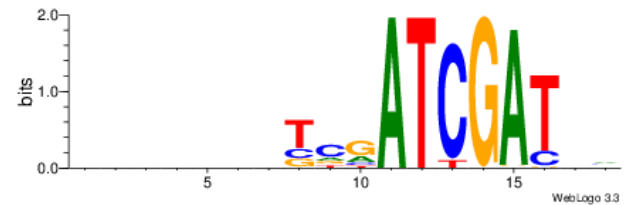

AGA 388 36 10.514

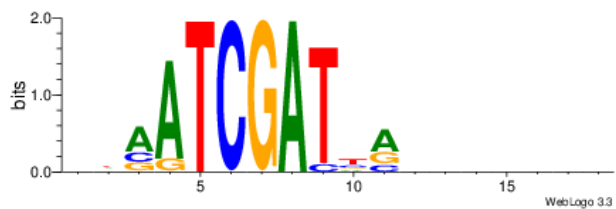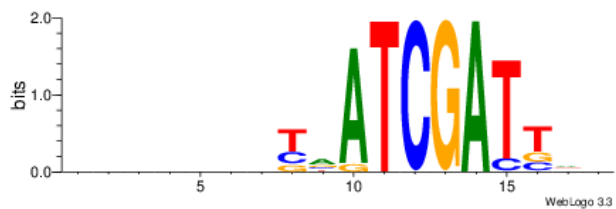

AGA 179 18 9.474

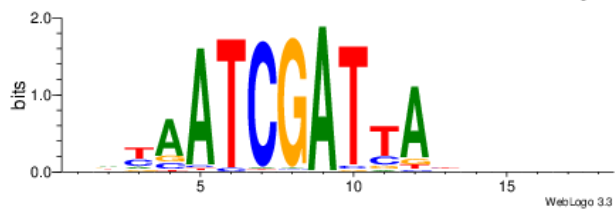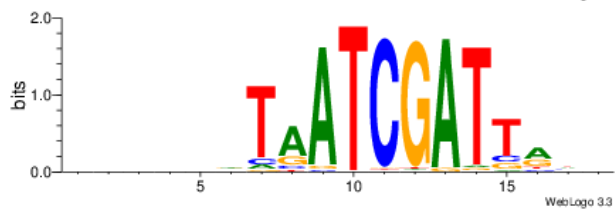

Supplement: pone.0101151.s001.pdf [file pone.0101151.s001.pdf]
