# Supplementary material for: Miz-1 Activates Gene Expression via a Novel Consensus DNA Binding Motif
Source: PubMed Central journal article supplement (PMC4077741; doi:10.1371/journal.pone.0101151), 2014-07-01

**Barcode AGC: 50 nM MBP-Miz1-ZF, 1 mM salt**

BC FG BG Enrichment Forward motif

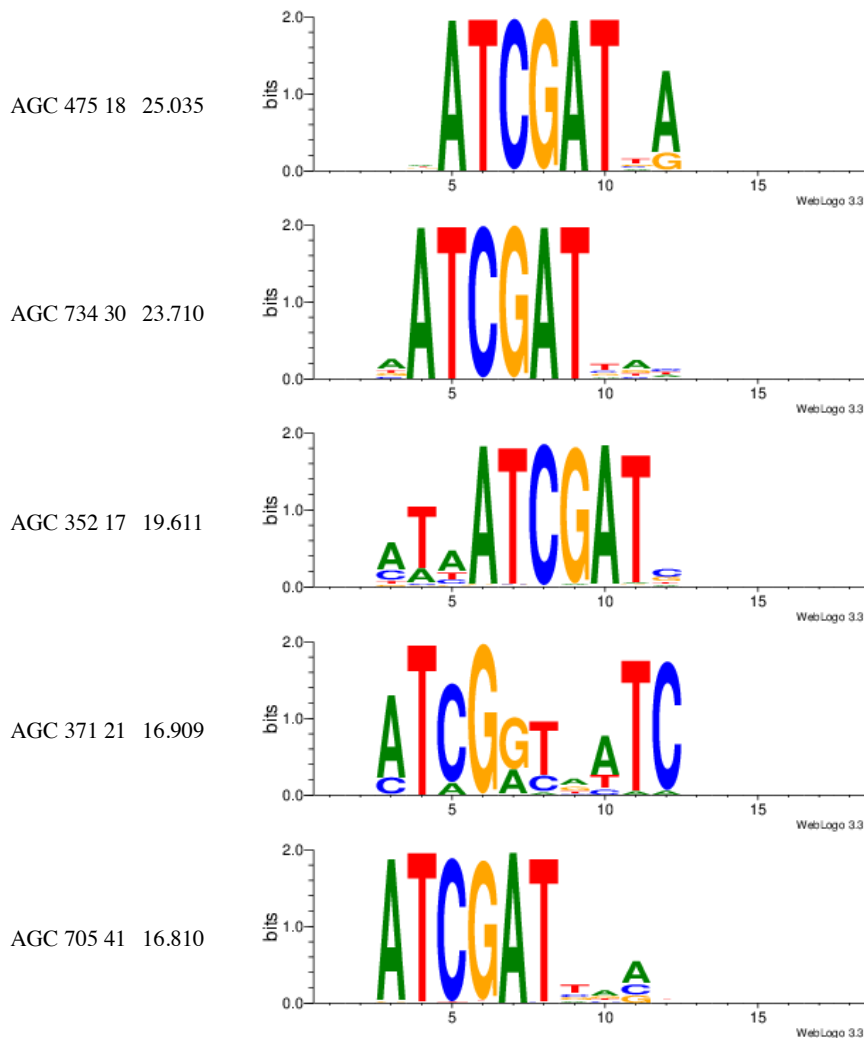

Reverse comp. motif

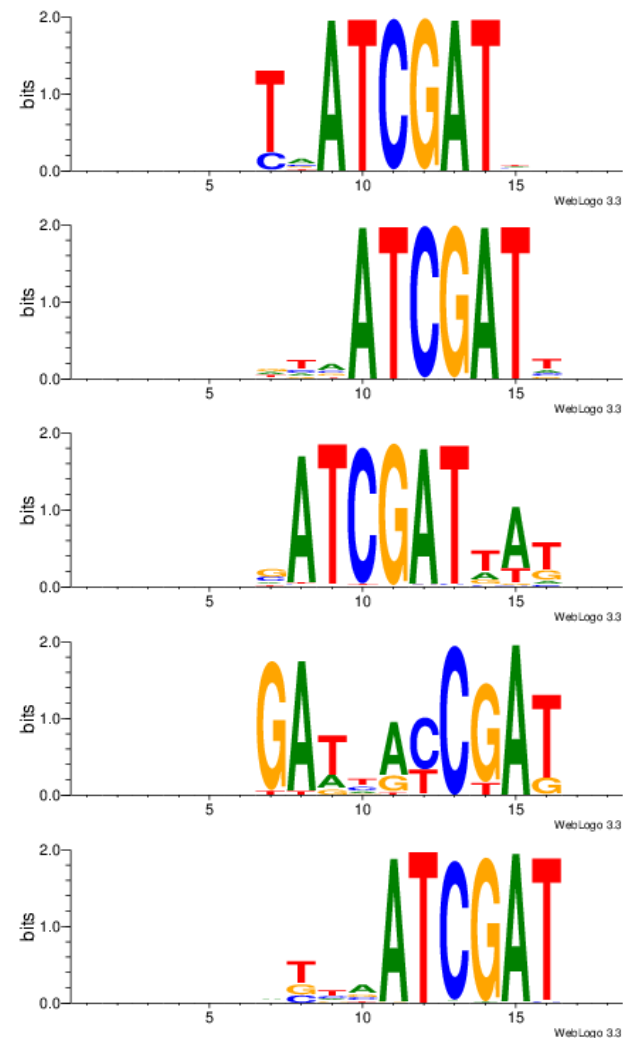

**Barcode AGG: 50 nM MBP-Miz1-ZF, 50 mM salt**

BC FG BG Enrichment Forward motif

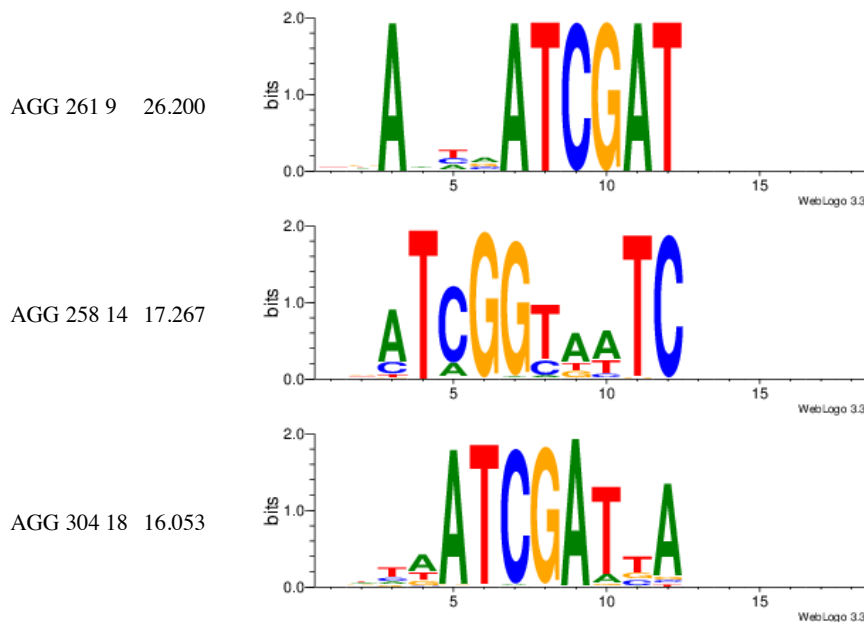

Reverse comp. motif

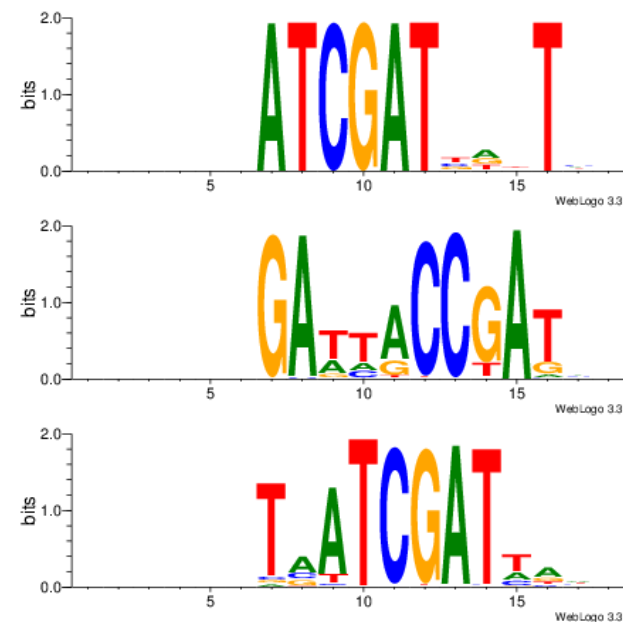

AGG 335 20 16.000

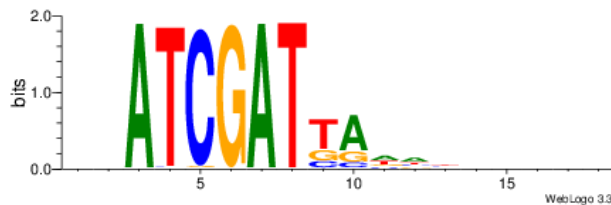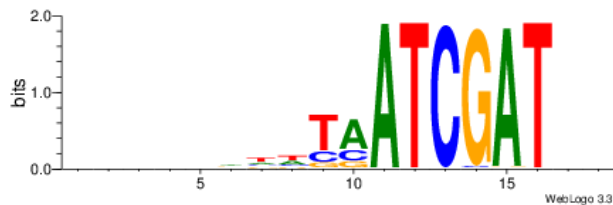

AGG 354 24 14.200

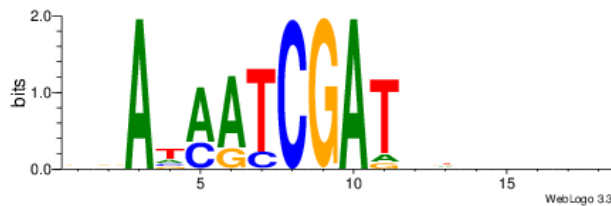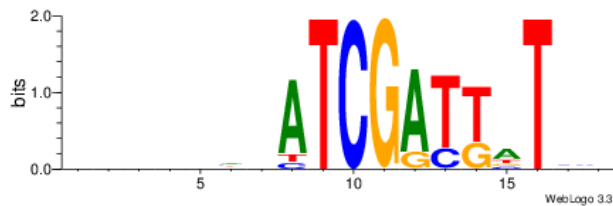

## Barcode AGT: 50 nM MBP-Miz1-ZF, 100 mM salt

BC FG BG Enrichment Forward motif

Reverse comp. motif

AGT 311 18 16.421

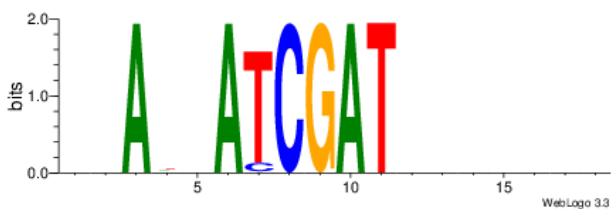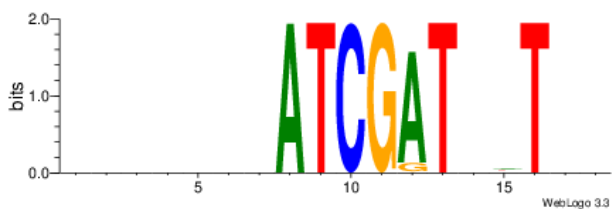

AGT 472 28 16.310

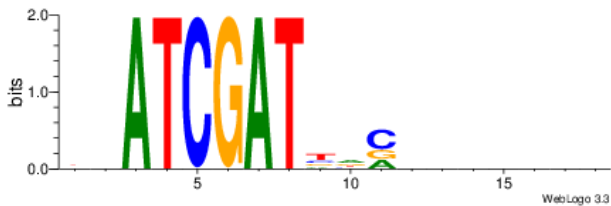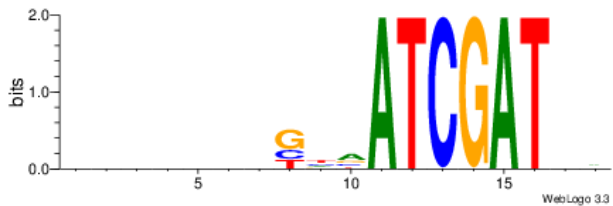

AGT 285 18 15.035

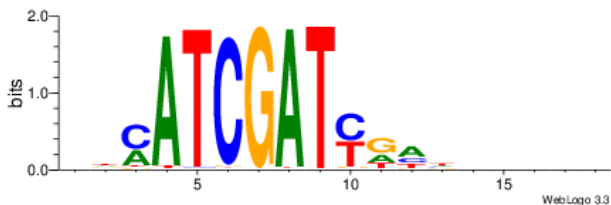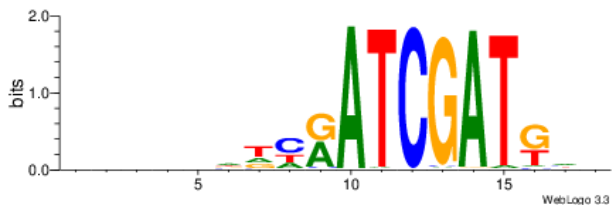

AGT 326 21 14.864

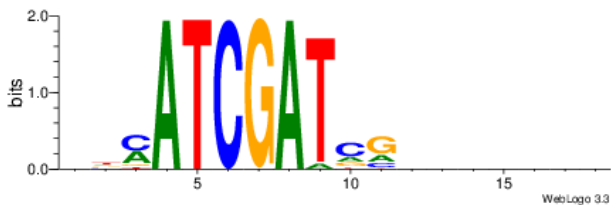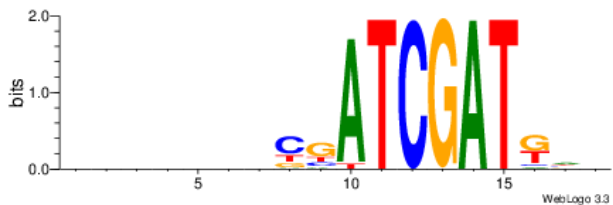

AGT 279 20 13.333

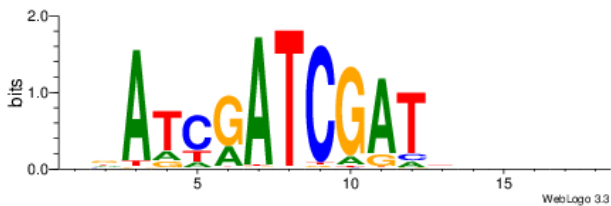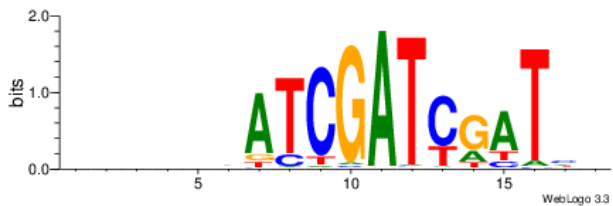

## Barcode ATA: 5 nM MBP-Miz1-ZF, 100 mM salt

BC FG BG Enrichment Forward motif

Reverse comp. motif

2.0

2.0

ATA 97 4 19.600

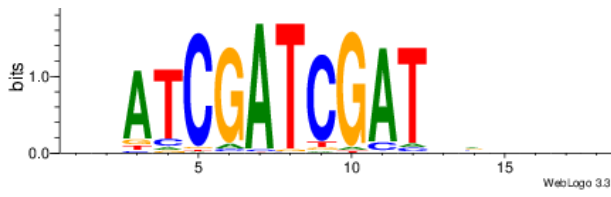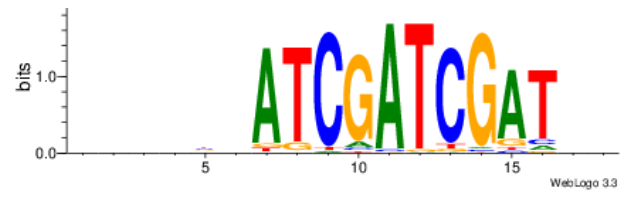

ATA 287 17 16.000

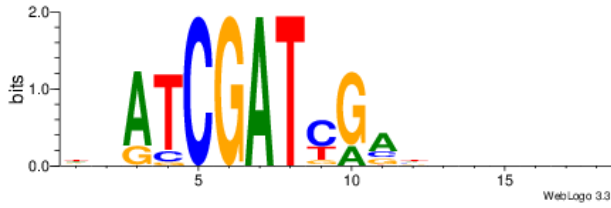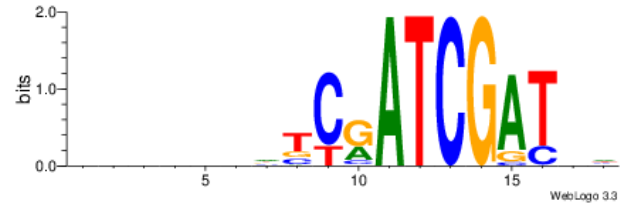

ATA 312 21 14.227

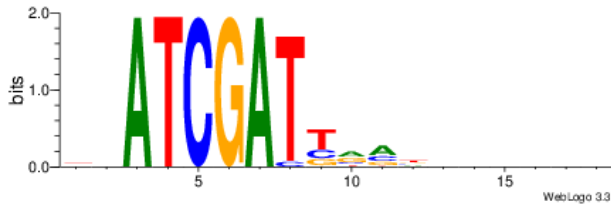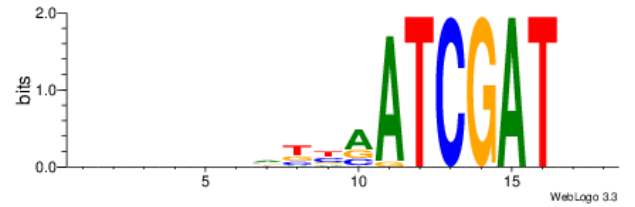

ATA 60 4 12.200

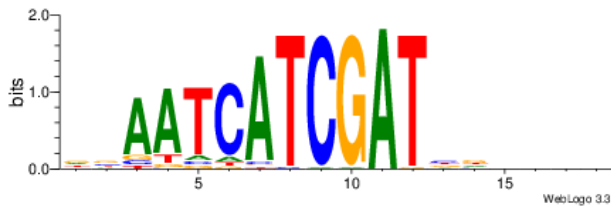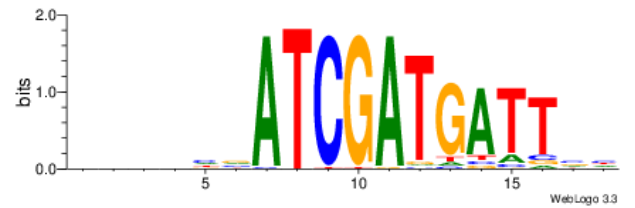

ATA 153 13 11.000

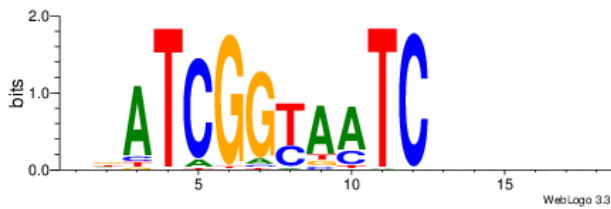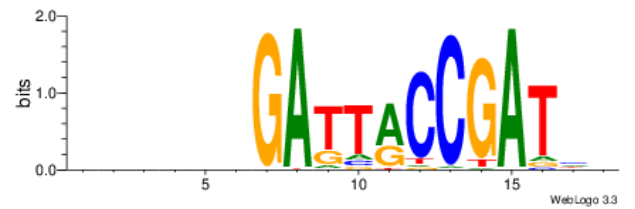

## Barcode ATC: 120 nM MBP-Miz1-ZF, 100 mM salt

BC FG BG Enrichment Forward motif

Reverse comp. motif

ATC 128 11 10.750

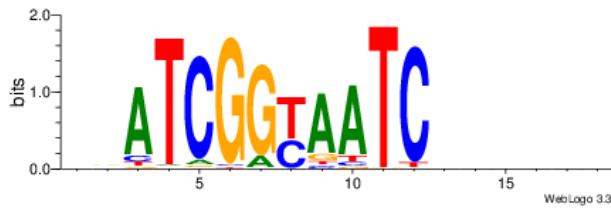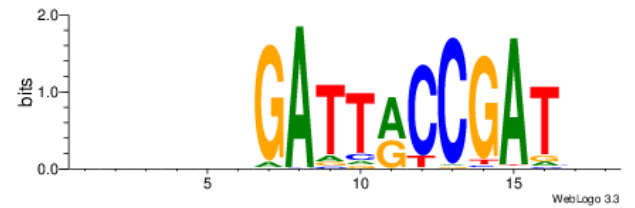

ATC 201 20 9.619

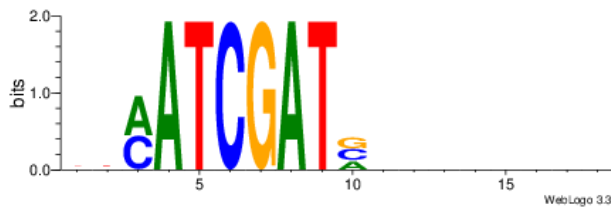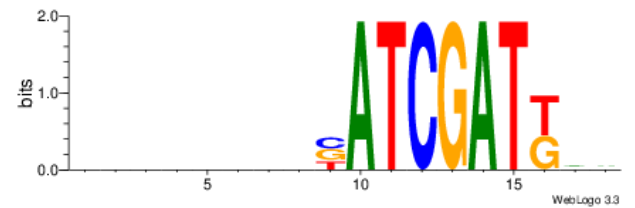

ATC 52 5 8.833

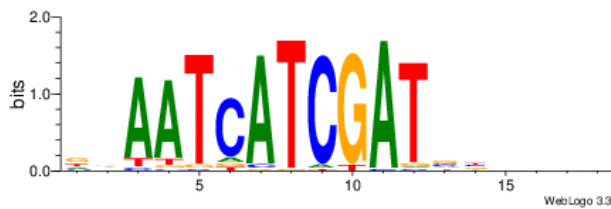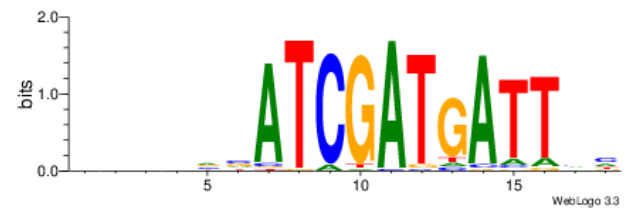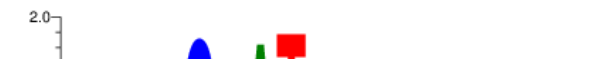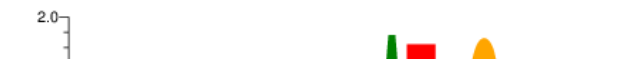

ATC 248 31 7.781

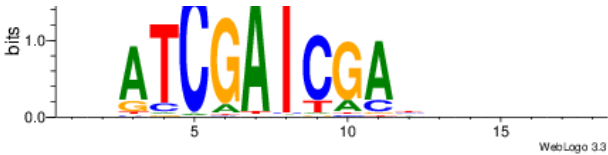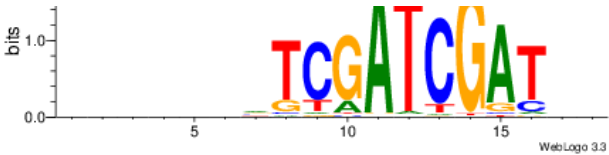

ATC 254 36 6.892

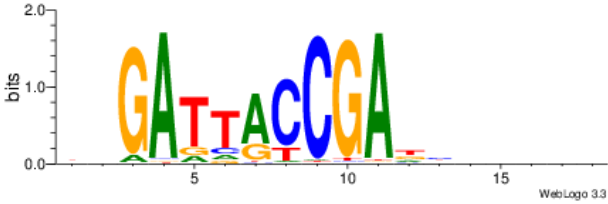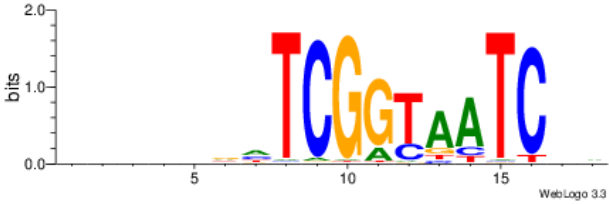

Supplement: pone.0101151.s002.pdf [file pone.0101151.s002.pdf]
